# Supplementary figures and images for: Structural, photoluminescence and energy transfer investigations of novel Dy3+ → Sm3+ co-doped NaCaPO4 phosphors for white-light-emitting diode applications
Source: Royal Society of Chemistry journal article supplement (doi:10.1039/d4dt01020e), 2024-01-01

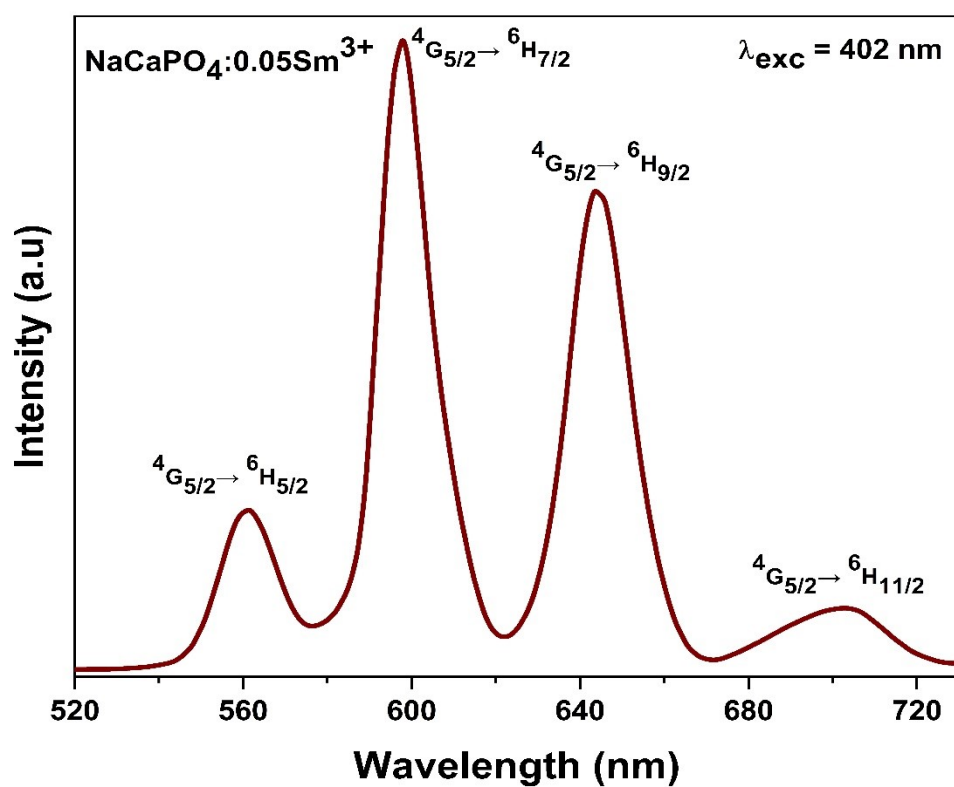

Fig. A1: The PL characteristics behaviour of NaCaPO<sub>4</sub>:0.05Sm<sup>3+</sup> at 402 nm excitation wavelength.

Supplement: d4dt01020e1.pdf [file d4dt01020e1.pdf]
